# Supplementary material for: Sloshing in Liquid Hydrogen and LOX Propellant Tanks After Main Engine Cut-off
Source: Royal Society of Chemistry journal article supplement (doi:10.1039/c5cp05273d), 2011-12-05
Supplement: c5cp05273d1.pdf [file c5cp05273d1.pdf]

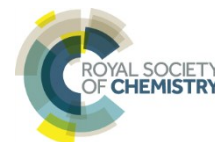

# Physical Chemistry Chemical Physics

## ARTICLE

### Electronic Supplementary Information

**Table S1.** Chemical shifts of protons in 600.13 MHz  $^1\text{H}$  NMR spectra of MRB7 and MRB8 (0h) and the induced chemical shifts alterations after incubation with DMPC liposomes for 30 min, 24 h, 48h and 60 h.

| <sup>1</sup> H             | Chemical shifts and DMPC induced alterations (in ppm) |         |            |         |         |       |         |         |            |         |  |
|----------------------------|-------------------------------------------------------|---------|------------|---------|---------|-------|---------|---------|------------|---------|--|
|                            | MRB7                                                  |         | DMPC/MRB7* |         |         |       | MRB8    |         | DMPC/MRB8* |         |  |
|                            | 0h                                                    | 30min   | 24h        | 48h     | 60h     | 0h    | 30min   | 24h     | 48h        | 60h     |  |
| <b>1,8</b>                 | 7.044                                                 | +0.031  | +0.031     | +0.024  | +0.023  | 6.986 | - 0.010 | 0       | +0.012     | +0.015  |  |
| <b>3,6</b>                 | 6.963                                                 | -*      | -*         | -*      | -*      | 6.898 | -0.006  | +0.004  | +0.018     | +0.018  |  |
| <b>4,5</b>                 | 7.297                                                 | +0.026  | +0.026     | +0.026  | +0.026  | 7.155 | 0       | +0.004  | +0.011     | +0.013  |  |
| <b>2a, 7a</b>              | 3.622                                                 | +0.139  | +0.139     | +0.139  | +0.140  | 3.175 | 0       | +0.006  | +0.022     | +0.026  |  |
| <b>2b, 7b</b>              | 1.254                                                 | -*      | -*         | -*      | -*      | -     | -       | -       | -          | -       |  |
| <b>2'</b>                  | 7.728                                                 | -*      | -*         | -*      | -*      | 7.736 | 0       | +0.003  | +0.008     | +0.009  |  |
| <b>3',4'</b>               | 8.033                                                 | -*      | -*         | -*      | -*      | 8.124 | 0       | 0       | 0          | 0       |  |
| <b>5'</b>                  | 8.191                                                 | +0.099  | +0.084     | +0.084  | +0.084  | 8.439 | -0.006  | -0.002  | +0.017     | +0.019  |  |
| <b>5''</b>                 | 6.531                                                 | +0.137  | +0.252     | +0.252  | +0.251  | 6.609 | -0.011  | +0.013  | +0.045     | +0.051  |  |
| <b>&gt;NCH<sub>3</sub></b> | 3.947                                                 | - 0.042 | - 0.044    | - 0.061 | - 0.061 | 4.041 | - 0.005 | - 0.005 | - 0.001    | - 0.003 |  |
| <b>&gt;CCH<sub>3</sub></b> | 2.605                                                 | - 0.021 | - 0.021    | - 0.031 | - 0.031 | 2.606 | - 0.002 | - 0.002 | - 0.005    | - 0.005 |  |

\*Overlapped signals

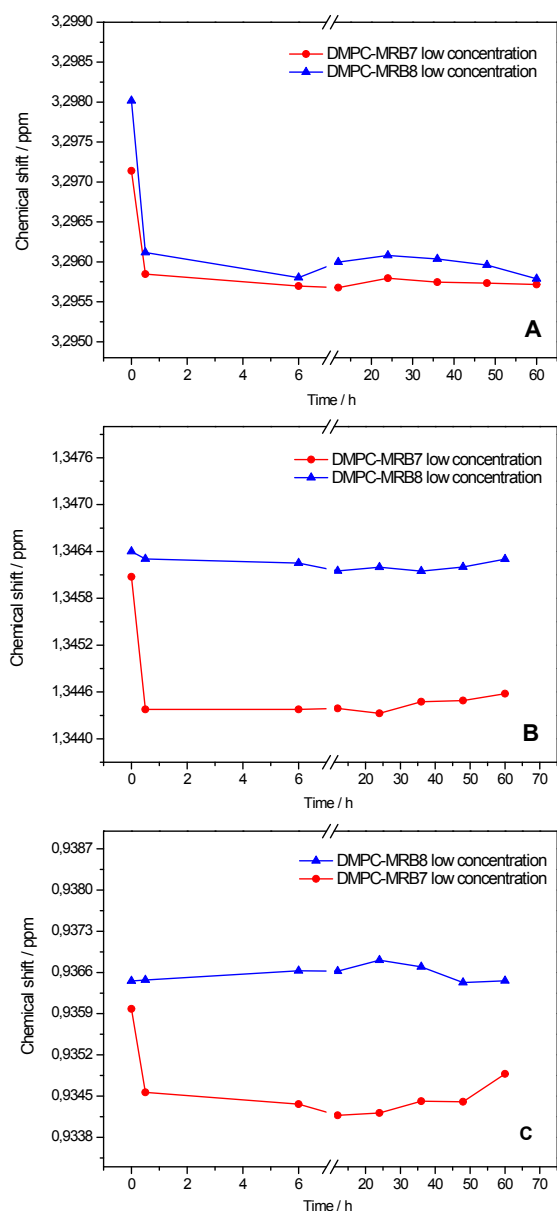

**ESI\_Figure S1.** Chemical shift of protons of the choline (A), -CH<sub>2</sub>- of acyl chain (B) and -CH<sub>3</sub> of acyl chain (C) groups in DMPC structure in the presence of MRB7 (red circles) or MRB8 (blue triangles), at low concentration.

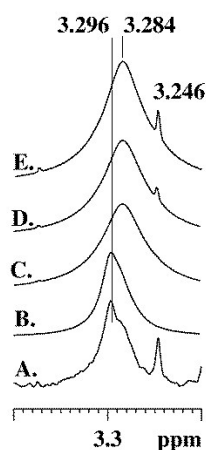

**ESI\_Figure S2.** Choline resonance signals in 600 MHz <sup>1</sup>H NMR spectra (in D<sub>2</sub>O, 310 K) of DMPC liposomes before (A) and after (B) extrusion; and of DMPC-MRB7\* after 24 h (C), 48 h (D) and 60 h (E) of incubation with MRB7, respectively.

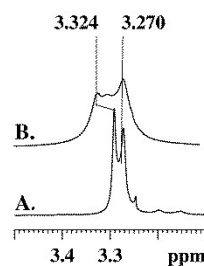

**ESI\_Figure S3.** Choline resonance signals in 600 MHz <sup>1</sup>H NMR spectra of DMPC-MRB8\* (in 60 h; in D<sub>2</sub>O; at 310 K) before (A) and after (B) addition of SmCl<sub>3</sub>.
